# Supplementary material
Source: publisher figshare collection journal article supplement (https://acs.figshare.com/ndownloader/files/7554244)

Supplementary Information for

C<sub>3</sub>N<sub>4</sub> Nanosheet Modified Microwell Array with Enhanced Electrochemiluminescence for Total  
Analysis of Cholesterol at Single Cells

Jingjing Xu<sup>1</sup>, Depeng Jiang<sup>2</sup>, Yanling Qin<sup>2</sup>, Juan Xia<sup>2</sup>, Dechen Jiang<sup>1\*</sup>, Hong-Yuan Chen<sup>1</sup>

1 State Key Laboratory of Analytical Chemistry for Life Science, School of Chemistry and  
Chemical Engineering, Nanjing University, Nanjing 210093, China

2 Department of Respiratory Medicine, The Second Affiliated Hospital, Chongqing Medical  
University, Chongqing 400010, China

Corresponding Author

Phone/Fax: 086-25-83594846

E-mail: dechenjiang@nju.edu.cn

## Table of contents

**Figure S1.** The luminescence ratio from (A) Au NPs/ITO slides and (B) C<sub>3</sub>N<sub>4</sub> nanosheet coated Au NPs/ITO slides before and after the addition of 50  $\mu$ M hydrogen peroxide.

**Figure S2.** (A) The bright-field image of C<sub>3</sub>N<sub>4</sub> nanosheet coated Au NPs/ITO slides; (B-G) The typical luminescence image of 500 nM, 1, 5, 10, 20 and 50  $\mu$ M hydrogen peroxide in microwells.

**Figure S3.** The bright-field image of microwells with single cells.

**Figure S4.** (A) The background luminescence image from single activated Hela cells in microwells; (B) the luminescence image from single activated Hela cells in microwells after the addition of 1 U/ml cholesterol oxidase; (C) the luminescence image collected in the first 60 s immediately after the introduction of cholesterol oxidase, cholesteryl esterase and triton X-100; (D) the luminescence image collected in the second 60 s.

**Figure S5.** (A) The background luminescence image from single ACAT inhibited Hela cells in microwells; (B) the luminescence image from single ACAT inhibited Hela cells in microwells after the addition of 1 U/ml cholesterol oxidase; (C) the luminescence image collected in the first 60 s immediately after the introduction of cholesterol oxidase, cholesteryl esterase and triton X-100; (D) the luminescence image collected in the second 60 s.

Figure S1. The luminescence ratio from (A) Au NPs/ITO slides and (B)  $C_3N_4$  nanosheet coated Au NPs/ITO slides before and after the addition of 50  $\mu M$  hydrogen peroxide.

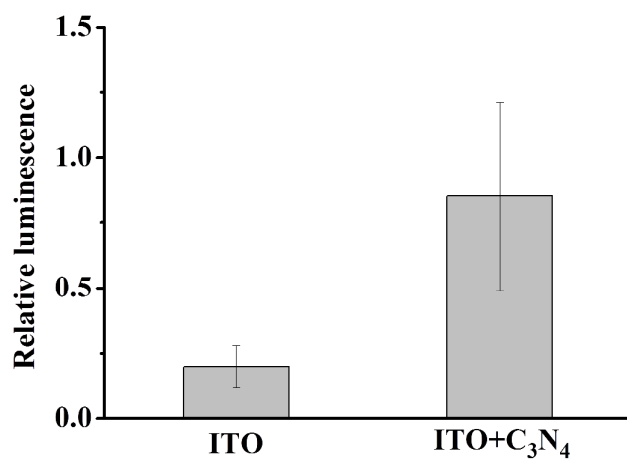

Figure S2. (A) The bright-field image of  $C_3N_4$  nanosheet coated Au NPs/ITO slides; (B-G) The typical luminescence image of 500 nM, 1, 5, 10, 20 and 50  $\mu M$  hydrogen peroxide in microwells.

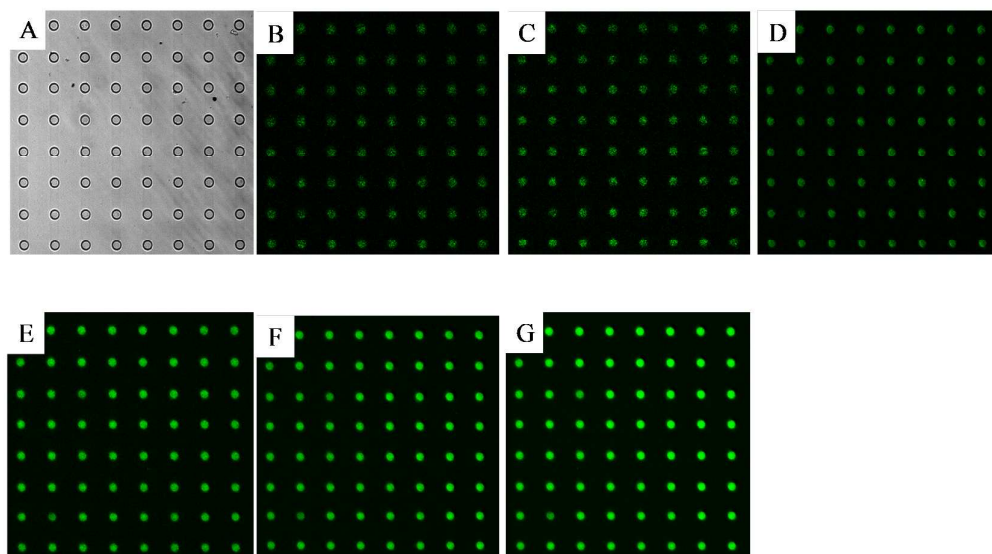

Figure S3. The bright-field image of microwells with single cells.

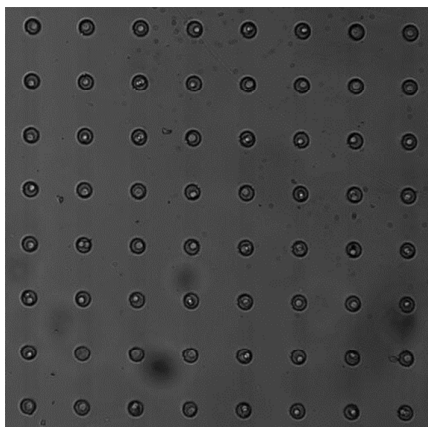

Figure S4. (A) The background luminescence image from single activated Hela cells in microwells; (B) the luminescence image from single activated Hela cells in microwells after the addition of 1 U/ml cholesterol oxidase; (C) the luminescence image collected in the first 60 s immediately after the introduction of cholesterol oxidase, cholesteryl esterase and triton X-100; (D) the luminescence image collected in the second 60 s.

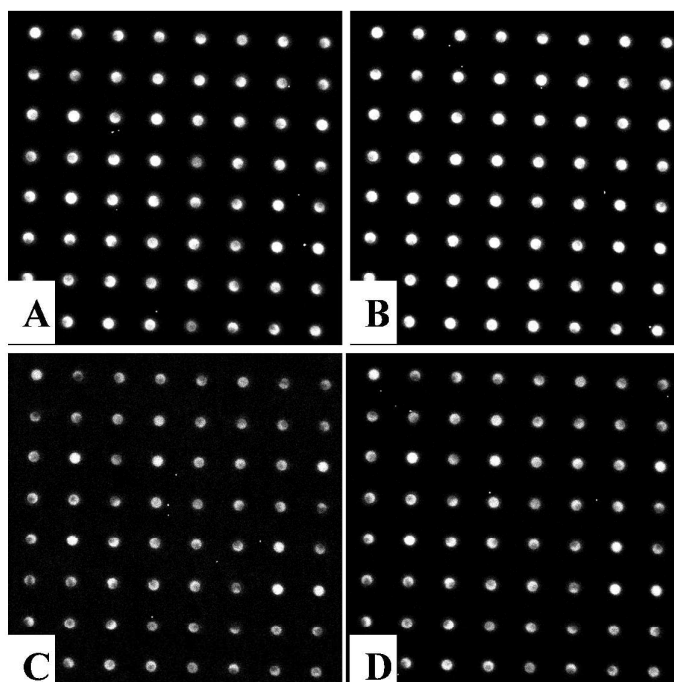

Figure S5. (A) The background luminescence image from single ACAT inhibited Hela cells in microwells; (B) the luminescence image from single ACAT inhibited Hela cells in microwells after the addition of 1 U/ml cholesterol oxidase; (C) the luminescence image collected in the first 60 s immediately after the introduction of cholesterol oxidase, cholesteryl esterase and triton X-100; (D) the luminescence image collected in the second 60 s.

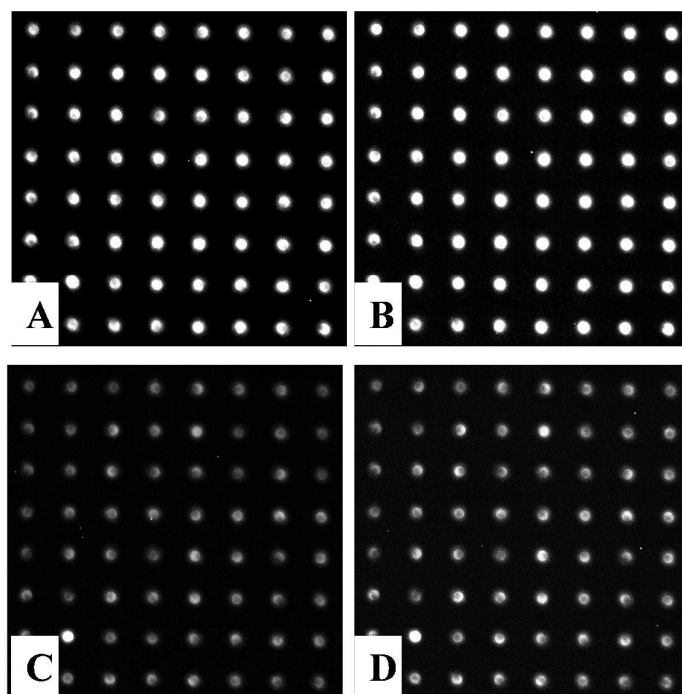

Supplement: Supplementary file 1 [file 7554244]
